# Supplementary material
Source: PubMed Central journal article supplement (PMC3130297)
Supplement: NIHMS291986-supplement-1.pdf [file NIHMS291986-supplement-1.pdf]

Supplemental Figure 1

## Assembly of Study Population

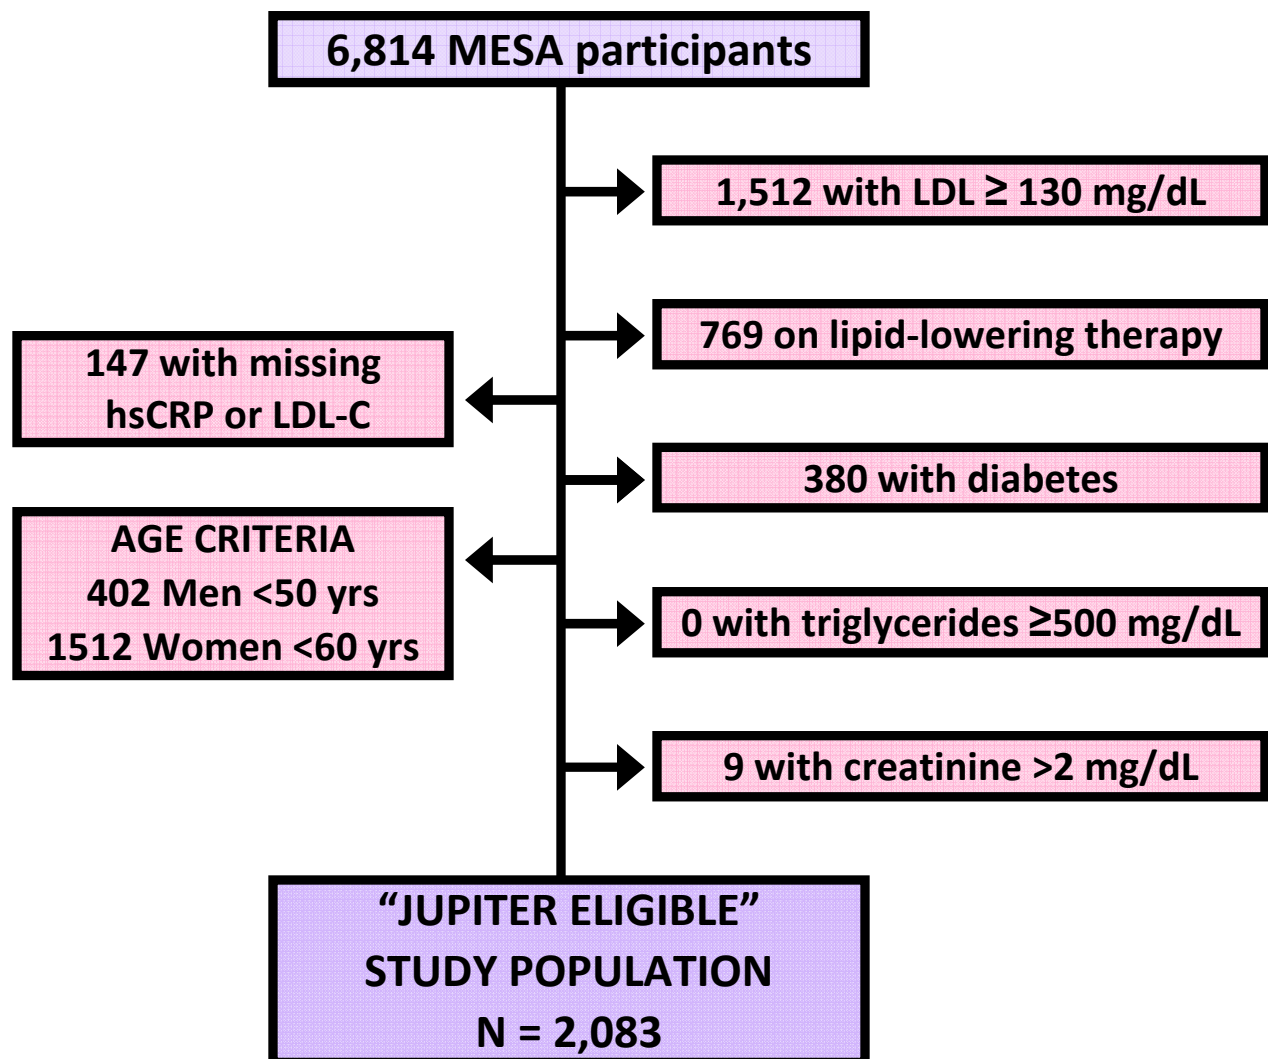

**Supplemental Table I: Association between obesity, metabolic syndrome, hsCRP  $\geq 2$ , and subclinical atherosclerosis in the fully adjusted total population - MESA (2000-2002).**

|                                               | <i>Odds Ratio</i>  |                                              | <i><math>\beta</math>-coefficient</i> |                          |
|-----------------------------------------------|--------------------|----------------------------------------------|---------------------------------------|--------------------------|
|                                               | <b>CAC&gt;0</b>    | <b>CIMT (&gt;75<sup>th</sup> percentile)</b> | <b>CAC score (log CAC + 1)</b>        | <b>Maximum CIMT (mm)</b> |
| <i>Total Population Fully adjusted*</i>       |                    |                                              |                                       |                          |
| <b>Normal weight/hsCRP&lt;2</b>               | 1 (ref)            | 1 (ref)                                      | 0 (ref)                               | 0 (ref)                  |
| <b>Normal weight/hsCRP<math>\geq 2</math></b> | 1.07 (0.90 – 1.28) | 1.23 (1.01 – 1.50)                           | 0.03 (-0.14 – 0.20)                   | 0.22 (0.10 – 0.33)       |
| <b>Obese/hsCRP&lt;2</b>                       | 1.26 (1.07 – 1.49) | 1.45 (1.20 – 1.75)                           | 0.30 (0.14 – 0.46)                    | 0.36 (0.25 – 0.47)       |
| <b>Obese/hsCRP<math>\geq 2</math></b>         | 1.17 (1.01 – 1.36) | 1.83 (1.55 – 2.17)                           | 0.18 (0.03 – 0.32)                    | 0.48 (0.38 – 0.57)       |
| <i>Total population Fully adjusted**</i>      |                    |                                              |                                       |                          |
| <b>No Met Syn/hsCRP&lt;2</b>                  | 1 (ref)            | 1 (ref)                                      | 0 (ref)                               | 0 (ref)                  |
| <b>No Met Syn/hsCRP<math>\geq 2</math></b>    | 1.02 (0.88 – 1.18) | 1.35 (1.13 – 1.61)                           | 0.02 (-0.12 – 0.17)                   | 0.27 (0.17 – 0.36)       |
| <b>Met Syn/hsCRP&lt;2</b>                     | 1.35 (1.13 – 1.62) | 1.55 (1.28 – 1.88)                           | 0.43 (0.26 – 0.61)                    | 0.31 (0.20 – 0.43)       |
| <b>Met Syn/hsCRP<math>\geq 2</math></b>       | 1.42 (1.21 – 1.65) | 1.95 (1.64 – 2.31)                           | 0.36 (0.21 – 0.51)                    | 0.46 (0.35 – 0.58)       |

\* Adjusted for age, gender, race, systolic blood pressure, diastolic blood pressure, smoking, LDL-C, HDL-C, triglycerides, anti-hypertensive medications

\*\* Adjusted for age, gender, race, systolic blood pressure, diastolic blood pressure, smoking, LDL-C, anti-hypertensive medications

$\beta$ -coefficient should be interpreted as the absolute difference between each category and the reference category.

**Supplemental Table II: Association between overweight, hsCRP  $\geq 2$ , and subclinical atherosclerosis in the MESA JUPITER population - MESA (2000-2002).**

|                                               | <i>Odds Ratio</i>  |                                              | <i><math>\beta</math>-coefficient</i> |                          |
|-----------------------------------------------|--------------------|----------------------------------------------|---------------------------------------|--------------------------|
|                                               | <b>CAC&gt;0</b>    | <b>CIMT (&gt;75<sup>th</sup> percentile)</b> | <b>CAC score (log CAC + 1)</b>        | <b>Maximum CIMT (mm)</b> |
| <i>Total Population</i>                       |                    |                                              |                                       |                          |
| <i>Age, gender, race adjusted</i>             |                    |                                              |                                       |                          |
| <b>Normal weight/hsCRP&lt;2</b>               | 1 (ref)            | 1 (ref)                                      | 0 (ref)                               | 0 (ref)                  |
| <b>Normal weight/hsCRP<math>\geq 2</math></b> | 1.30 (1.03 – 1.63) | 1.20 (0.92 – 1.57)                           | 0.14 (-0.08 – 0.37)                   | 0.20 (0.05 – 0.35)       |
| <b>Overweight/hsCRP&lt;2</b>                  | 1.23 (1.04 – 1.47) | 1.64 (1.34 – 2.01)                           | 0.21 (0.04 – 0.38)                    | 0.44 (0.33 – 0.56)       |
| <b>Overweight/hsCRP<math>\geq 2</math></b>    | 1.27 (1.06 – 1.52) | 2.27 (1.85 – 2.80)                           | 0.22 (0.04 – 0.40)                    | 0.66 (0.54 – 0.78)       |
| <i>MESA JUPITER population*</i>               |                    |                                              |                                       |                          |
| <i>Age, gender, race adjusted</i>             |                    |                                              |                                       |                          |
| <b>Normal weight/hsCRP&lt;2</b>               | 1 (ref)            | 1 (ref)                                      | 0 (ref)                               | 0 (ref)                  |
| <b>Normal weight/hsCRP<math>\geq 2</math></b> | 1.17 (0.82 – 1.67) | 1.16 (0.76 – 1.78)                           | 0.10 (-0.29 – 0.50)                   | 0.23 (-0.02 – 0.47)      |
| <b>Overweight/hsCRP&lt;2</b>                  | 1.33 (1.00 – 1.78) | 1.78 (1.28 – 2.48)                           | 0.35 (0.04 – 0.67)                    | 0.53 (0.34 – 0.72)       |
| <b>Overweight/hsCRP<math>\geq 2</math></b>    | 1.25 (0.93 – 1.68) | 2.67 (1.91 – 3.73)                           | 0.40 (0.06 – 0.73)                    | 0.81 (0.60 – 1.01)       |
| <i>MESA JUPITER population*</i>               |                    |                                              |                                       |                          |
| <i>Fully adjusted**</i>                       |                    |                                              |                                       |                          |
| <b>Normal weight/hsCRP&lt;2</b>               | 1 (ref)            | 1 (ref)                                      | 0 (ref)                               | 0 (ref)                  |
| <b>Normal weight/hsCRP<math>\geq 2</math></b> | 1.13 (0.78 – 1.63) | 1.20 (0.77 – 1.88)                           | 0.03 (-0.36 – 0.42)                   | 0.24 (0.00 – 0.48)       |
| <b>Overweight/hsCRP&lt;2</b>                  | 1.18 (0.88 – 1.60) | 1.71 (1.22 – 2.42)                           | 0.23 (-0.08 – 0.55)                   | 0.46 (0.27 – 0.66)       |
| <b>Overweight/hsCRP<math>\geq 2</math></b>    | 1.06 (0.78 – 1.44) | 2.62 (1.84 – 3.72)                           | 0.22 (-0.12 – 0.56)                   | 0.70 (0.49 – 0.91)       |

\* **MESA JUPITER population (N=2,083):** Men age  $\geq 50$  and women  $\geq 60$  with LDL-C  $< 130$  mg/dL, not on lipid-lowering therapy, without diabetes, triglycerides  $\leq 500$  mg/dL, and creatinine  $\leq 2$  mg/dL

\*\* **Fully adjusted model:** Adjusted for age, gender, race, systolic blood pressure, diastolic blood pressure, smoking, LDL-C, HDL-C, triglycerides, anti-hypertensive medications

$\beta$ -coefficient should be interpreted as the absolute difference between each category and the reference category.
